# Supplementary material
Source: publisher figshare collection journal article supplement (https://tandf.figshare.com/ndownloader/files/13179551)
Supplement: Supplementary file 1 [file 13179551]

Supplementary Table 1. All adverse drug reactions.

| Number of participating medical institutions | | 117 |
| --- | --- | --- |
| Number of patients surveyed | | 476 |
| Number of patients with ADRs | | 99 |
| Number of ADRs | | 132 |
| Incidence of ADRs | | 20.8% |
| Type of ADR | | n (%) |
|  | **Psychiatric disorders** | **31 (6.5)** |
|  | Delirium | 1 (0.2) |
|  | Delusion | 3 (0.6) |
|  | Depression | 1 (0.2) |
|  | Hallucination | 16 (3.4) |
|  | Hallucination, visual | 6 (1.3) |
|  | Insomnia | 2 (0.4) |
|  | Irritability | 1 (0.2) |
|  | Persecutory delusion | 1 (0.2) |
|  | Restlessness | 1 (0.2) |
|  | Psychiatric symptom | 1 (0.2) |
|  | Parasomnia | 2 (0.4) |
|  | **Nervous system disorders** | **36 (7.6)** |
|  | Akinesia | 1 (0.2) |
|  | Dizziness | 1 (0.2) |
|  | Dyskinesia | 24 (5.0) |
|  | Epilepsy | 1 (0.2) |
|  | Headache | 1 (0.2) |
|  | Hypoesthesia | 1 (0.2) |
|  | Somnolence | 5 (1.1) |
|  | Tremor | 1 (0.2) |
|  | Freezing phenomenon | 1 (0.2) |
|  | Parkinson’s disease | 1 (0.2) |
|  | Head titubation | 1 (0.2) |
|  | **Eye disorders** | **1 (0.2)** |
|  | Visual impairment | 1 (0.2) |
|  | **Cardiac disorders** | **4 (0.8)** |
|  | Cardiac failure | 1 (0.2) |
|  | Cardiac failure acute | 1 (0.2) |
|  | Myocardial infarction | 1 (0.2) |
|  | Palpitations | 1 (0.2) |
|  | **Respiratory, thoracic, and mediastinal disorders** | **2 (0.4)** |
|  | Dyspnea | 1 (0.2) |
|  | Pleural effusion | 1 (0.2) |
|  | **Gastrointestinal disorders** | **13 (2.7)** |
|  | Abdominal discomfort | 3 (0.6) |
|  | Abdominal distension | 1 (0.2) |
|  | Abdominal pain | 1 (0.2) |
|  | Ascites | 1 (0.2) |
|  | Constipation | 3 (0.6) |
|  | Nausea | 3 (0.6) |
|  | Swollen tongue | 1 (0.2) |
|  | **Hepatobiliary disorders** | **2 (0.4)** |
|  | Cholecystitis acute | 1 (0.2) |
|  | Hepatic function abnormal | 1 (0.2) |
|  | **Skin and subcutaneous tissue disorders** | **4 (0.8)** |
|  | Henoch–Schönlein purpura | 1 (0.2) |
|  | Rash | 3 (0.6) |
|  | **Musculoskeletal and connective tissue disorders** | **1 (0.2)** |
|  | Rhabdomyolysis | 1 (0.2) |
|  | **Renal and urinary disorders** | **3 (0.6)** |
|  | Calculus urinary | 1 (0.2) |
|  | Pollakiuria | 2 (0.4) |
|  | **General disorders and administration site conditions** | **14 (2.9)** |
|  | Death | 1 (0.2) |
|  | Feeling abnormal | 4 (0.8) |
|  | Malaise | 3 (0.6) |
|  | Edema peripheral | 4 (0.8) |
|  | Pyrexia | 1 (0.2) |
|  | Thirst | 1 (0.2) |
|  | **Investigations** | **7 (1.5)** |
|  | Alanine aminotransferase increased | 1 (0.2) |
|  | Amylase increased | 1 (0.2) |
|  | Aspartate aminotransferase increased | 1 (0.2) |
|  | Blood creatine phosphokinase increased | 1 (0.2) |
|  | Blood creatinine increased | 1 (0.2) |
|  | Blood lactate dehydrogenase increased | 1 (0.2) |
|  | Blood pressure increased | 1 (0.2) |
|  | Blood urea increased | 1 (0.2) |
|  | C-reactive protein increased | 1 (0.2) |
|  | Gamma-glutamyltransferase increased | 1 (0.2) |
|  | Liver function test abnormal | 1 (0.2) |
|  | Weight decreased | 1 (0.2) |
|  | White blood cell count increased | 1 (0.2) |
|  | Blood alkaline phosphatase increased | 1 (0.2) |
|  | **Injury, poisoning and procedural complications** | **1 (0.2)** |
|  | Pubis fracture | 1 (0.2) |
| Coded in MedDRA/J (Ver19.1). | |  |
|  | |  |

ADR: adverse drug reaction; MedDRA: Medical Dictionary for Regulatory Activities.

Supplementary Table 2. Serious adverse drug reactions.

| SADR | | n (%) |
| --- | --- | --- |
|  | Delirium | 1 (0.2) |
|  | Delusion | 3 (0.6) |
|  | Depression | 1 (0.2) |
|  | Hallucination | 2 (0.4) |
|  | Irritability | 1 (0.2) |
|  | Epilepsy | 1 (0.2) |
|  | Parkinson’s disease | 1 (0.2) |
|  | Cardiac failure | 1 (0.2) |
|  | Cardiac failure acute | 1 (0.2) |
|  | Myocardial infarction | 1 (0.2) |
|  | Ascites | 1 (0.2) |
|  | Cholecystitis acute | 1 (0.2) |
|  | Rhabdomyolysis | 1 (0.2) |
|  | Calculus urinary | 1 (0.2) |
|  | Death | 1 (0.2) |
|  | Feeling abnormal | 1 (0.2) |
|  | Edema peripheral | 1 (0.2) |
|  | Alanine aminotransferase increased | 1 (0.2) |
|  | Aspartate aminotransferase increased | 1 (0.2) |
|  | C-reactive protein increased | 1 (0.2) |
|  | Gamma-glutamyltransferase increased | 1 (0.2) |
|  | White blood cell count increased | 1 (0.2) |
|  | Blood alkaline phosphatase increased | 1 (0.2) |
| Coded in MedDRA/J (Ver19.1). | |  |
|  | |  |

SADR: serious adverse drug reaction; MedDRA: Medical Dictionary for Regulatory Activities.
